# Supplementary material
Source: HighWire-hosted journal article supplement (doi:10.1101/rna.078963.121)
Supplement: Supplemental_Figure_Legends.docx [file Supplemental_Figure_Legends.docx]

**Supplemental Figure Legends**

**Figure S1.**

Steady-state and dynamic ribosome profiling. (*A*) In steady state-ribosome profiling, ribosomes are “frozen” on mRNA with cycloheximide, followed by RNase digestion, purification of 80S ribosome monomers containing ribosome protected fragments (RPFs), deproteinization, and RNA sequencing. From the same samples, RNA is extracted, fragmented, and sequenced. The RPFs and RNA-seq are then aligned. (*B*) In dynamic ribosme profiling, cells or tissue are treated with homoharringtonine (HHT), which “freezes” ribosomes on initiation codons but allows elongating ribosomes to continue to translocate and eventually run off the mRNA. Collection and sequencing of the RPFs and input RNA is then conducted as in steaty-state ribosome profiling.

**Figure S2.**

Side by side comparison of ribosome profiling using RNase I or RNase A/T1 and a second replicate using RNase 1. The reporters transfected into HEK cells contained or lacked *G4C2(70)* is indicated. The same qualitative ribosome footprints in intron 1 were detected irrespective of the nuclease.

**Figure S3**

Side by side comparison of ribosome profiling using RNase I or RNase A/T1 showing codon resolution. RNaseI has an optimal 29 nt ribosome protected fragment with high codon resolution, and was used for initiation site mapping.

**Figure S4**

Secondary and tertiary structure predictions of the C9ORF72 uORF. (A) NanoLC-MS/MS analysis was performed on HEK293T cells expressing the C9ORF72 reporter plasmid or the C9ORF72 reporter plasmid in which the start codon for the uORF was mutated. The identified peptide, LLLFWGR was only found in the unmutated plasmid sample. *(B)* Jnet and jhmm are secondary structure predictions; H refers to helix and E refers to strand. Lupas is a coiled-coil prediction program. Jnet_xx predicts residue burial; xx is a cut-off, B refers to buried. Jnet Rel is the confidence level with 9 being most confident. *(C)* Three-dimensional model of the uORF polypeptide. The I-TASSER server (Yang and Zhang 2015) was used to provide a structural prediction for the peptide in which secondary structures were first identified and then compared with existing structural models in the Protein Data Bank database. Based on the primary sequence, two alpha helices were identified with high confidence flanking a flexible loop region, which suggests that this peptide may adopt a helix-turn-helix motif. *(D)* Alignment of the C9ORF72 uORF between human, orangutan, chimpanzee, macaque, cow and cat sequences, analyzed with T-Coffee and produced in Boxshade. T-Coffee is an opensource package distributed under the [GNU public license](http://www.gnu.org/copyleft/gpl.html). Boxshade v3.21 was used on the ExPASy Bioinformatics resource portal.
